# Supplementary material
Source: MDPI journal article supplement (https://www.mdpi.com/2073-4441/11/6/1160)
Supplement: s1 [file s1]

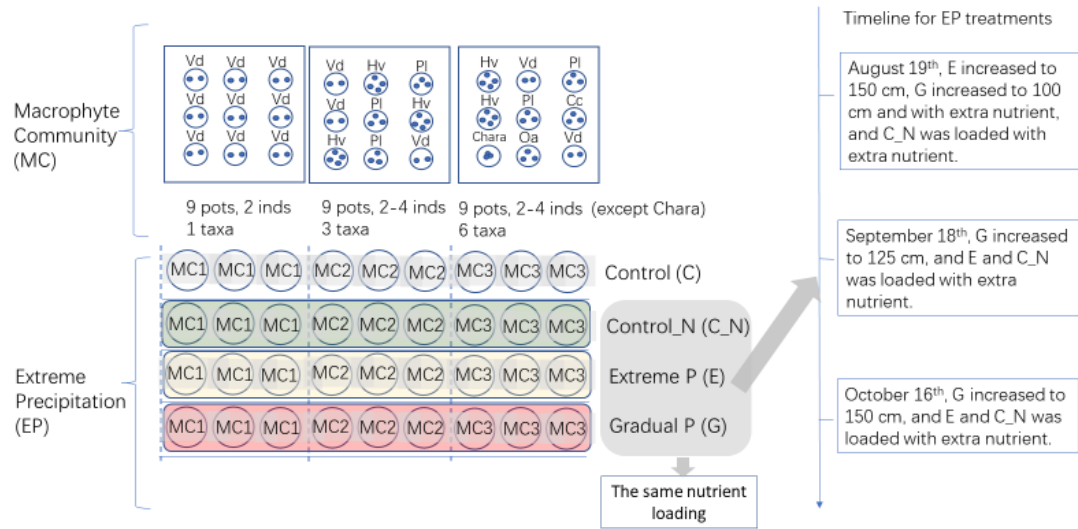

**Figure S1.** Diagram showing the experiment setup.

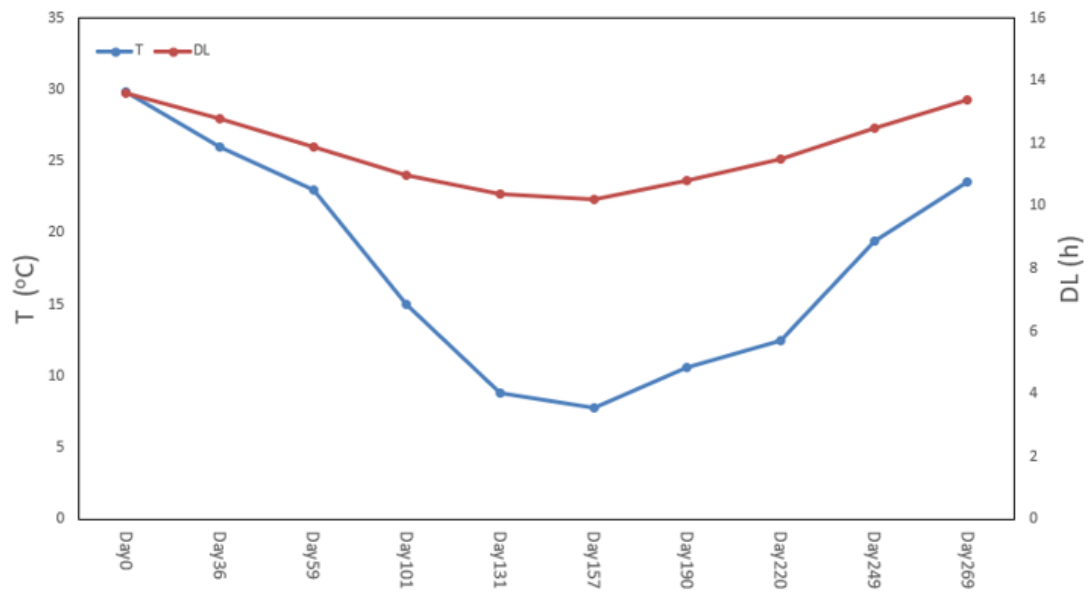

**Figure S2.** Monthly changes of temperature (T, the unit of °C) and theoretical daylight length (DL, the unit of hour) during the experiment period.

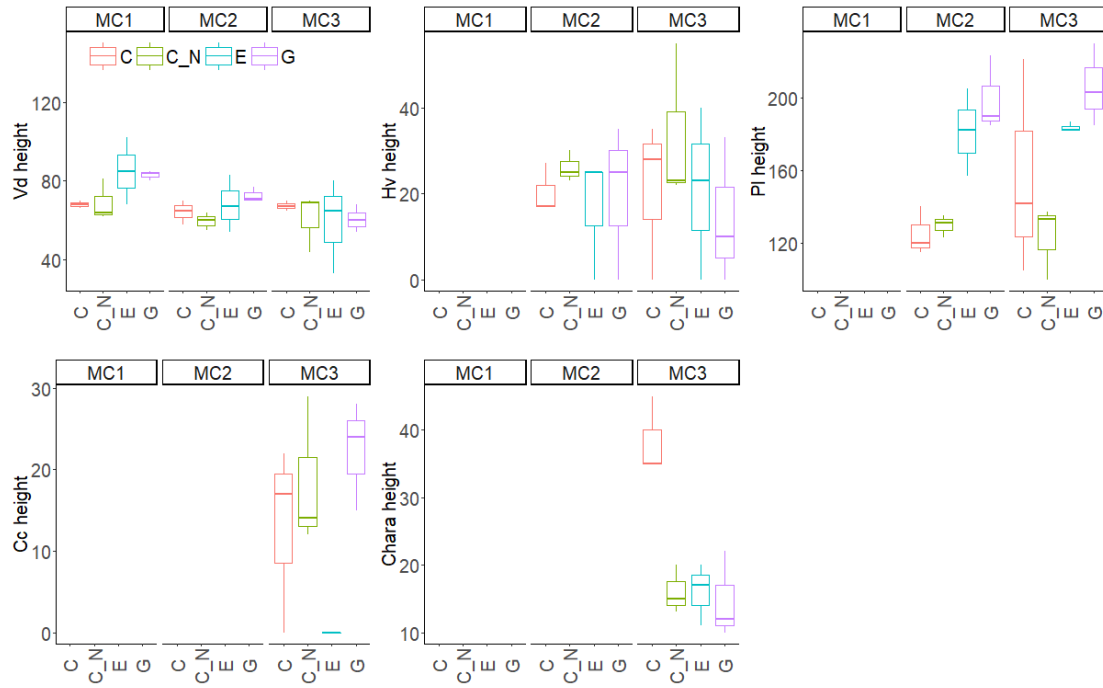

**Figure S3.** Maximum height of the five submerged macrophyte species used at the end of the experiment for three macrophyte community treatments (MC1, MC2 and MC3) and four extreme precipitation treatments (EP: C, C\_N, E, and G). Vd = *Vallisneria denseserrulata*; Hv = *Hydrilla verticillata*; Pl = *Potamogeton lucens*; Cc = *Cabomba caroliniana*; Chara = *Chara* sp.

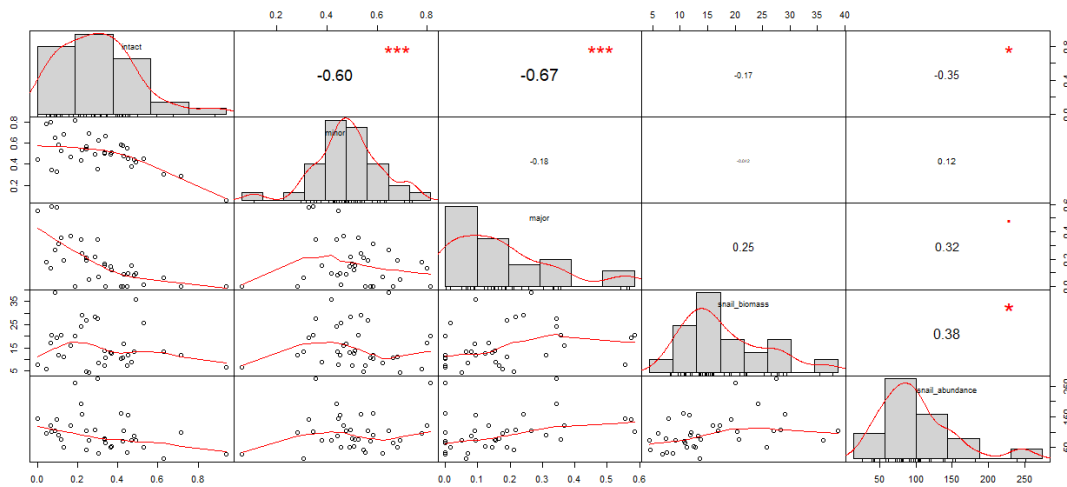

**Figure S4.** Correlation analysis between the three categories of leaf intactness of *Vallisneria denseserrulata* and snail biomass (and abundance). Leaf intactness was categorised into intact, minor and major damages. The number on the upper diagonal is the Pearson correlation coefficient  $r$  and the star (\*) indicates the significance level: \* =  $p < 0.05$ ; \*\*\* =  $p < 0.001$ .

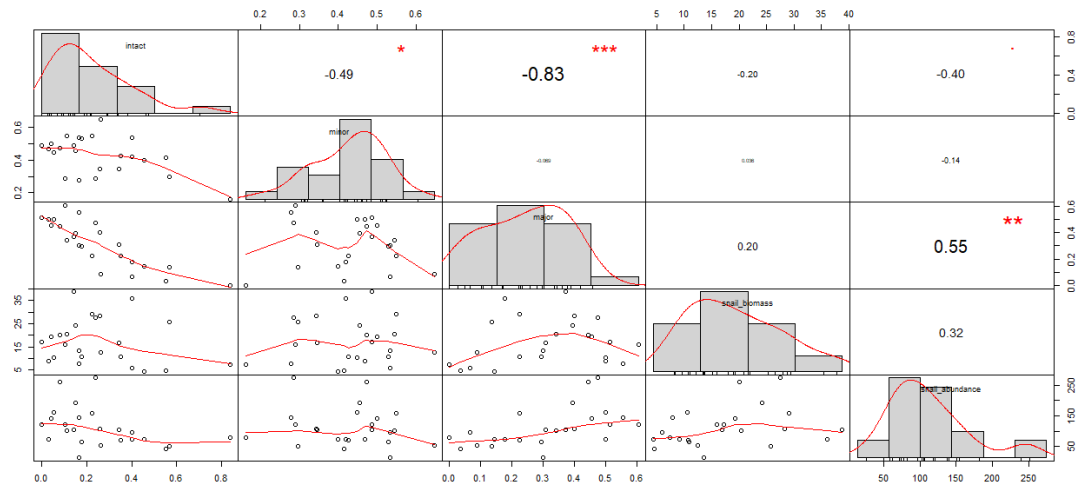

**Figure S5.** Correlation analysis between the three categories of leaf intactness of *Potamogeton lucens* and snail biomass (and abundance). Leaf intactness was categorised as intact, minor and major damages. The number on the upper diagonal is the Pearson correlation coefficient  $r$  and the star (\*) indicates the significance level: \* =  $p < 0.05$ ; \*\* =  $p < 0.01$ ; \*\*\* =  $p < 0.001$ .
